# Supplementary material for: A Nested Qualitative Evaluation of User Experiences in a Randomized Trial of a Digital Intervention To Support Total-Skin-Self-Examination By Melanoma Survivors
Source: Research Square preprint supplement (doi:10.21203/rs.3.rs-847522/v1), 2021-10-01
Supplement: Supplementary file 1 [file 584f52a2149e6778d0b568ff.docx]

**Achieving Self-directed Integrated Cancer Aftercare (ASICA) for melanoma survivors: a nested qualitative evaluation of user experiences in a randomized trial of a digital intervention to support total-skin-self-examination by melanoma survivors.**

**Felicity Reilly1, Nuha Wani2, Susan Hall1, Heather Morgan1, Julia Allan4, Lynda Constable,3 Peter Murchie1**

**Semi-Structured Interview with WB**

WB, PM and FR

Interview was undertaken to understand WB’s perceptions and experience during the ASICA trial. The last contact WB had with any of the participants was in March from a report in January. 121 people were randomised in the intervention group, with 108 completed the training and given the app. 69 interacted with WB submitting concerns, on 8 occasions it was single test image. 61 individuals submitted 123 reports with 189 separate concerns. The majority submitted only 1 report however a small minority submitted up to 8 reports.

1. Q: Were there any challenges dealing with the Cambridge participants compared to the Grampian patients?
   A: No concerns- the contact in Cambridge allowed for smooth access into local services.
2. Q: How well trained were the participants?
   A: Individuals seemed very well trained for the few who did not seem keen on technology they were helped by family members. Main issue was around the size of the tablet- the size made it difficult to manoeuvre, this along with the app auto zoom feature made the images very blurry.
   WB believes the app on own device would lead to large improvement.
3. Q: Did WB have any sense of who used and who didn’t use it as often?
   A: Did not get any sense of age, gender etc Had not considered rurality but did not feel it had any effect.
4. Q: How much workload did the ASICA trial create?
   A: WB had allocated 2hrs per day for the trial but on average had only taken an hour per day. Contacting patients after reports was the most time consuming especially with the non-response of a number of patients.
   Most of the reports were submitting over the weekend so the first half of the week was busier.
   A huge improvement to the app would be a direct message function between the clinician and the patient. This would eliminate a large chunk of the follow up time due to attempts to contact the patients.
5. Q: Did patients use the reports responsibly and sparingly?
   A: Generally was responsibly used- only a couple used excessively. This was mainly due to anxiety and seeking out reassurance. Did not believe it was the app making them anxious but rather they were generally anxious people.
   Some did use as a general skin health tool rather than using it specifically for cancer follow up. When prompted this was inappropriate along with some general advice from WB most seemed receptive.
6. Q: Was the site of the primary lesion the focus of the patients or was the whole body considered?
   A: A small number focused on primary site but general impression was most were carrying out full body examination. WB was more suspicious around primary site due to increased risk of ?recurrence, leading to quicker action.
7. Q: Were the images submitted generally poor quality?
   Were you able to make assessment (benign) with these images?
   A: Lots of images were poor quality: increased workload in getting patients to submit new images first via the app then via own device. Own device appeared easier and mor successful.
   Was able to assess bad quality images with sufficient history and mole map.
   Normally concern was around existing mole due to checking patients had become more aware of their skin.
8. Q: Why were there so many defaults after patients make the initial contact?
   A: A limit was set up on follow up: twice in 7 days.
   Unsure why this was the case: ?actually unconcerned ?sees GP or clinic.
   Opinion is cannot be too paternalistic about it.
9. Q: Could a non-specialist nurse be trained to do the first level of triage based on the range of conditions you saw?
   What kind of training do you think would be appropriate?
   A: Most of the work was procedural. Believes it is mainly pattern recognition which requires experience. A training package could be designed: algorithmic which points to benign vs suspicious. Generally ANPs referrals to derm are poor, this training may be generally widely up taken and useful.
   4 pathway identified which could be used by nurse. High risk 🡪 specialist ANP. Low risk 🡪 triage out and reassure. Not Relevant 🡪 advice and appropriate action. Poor Image 🡪 obtain better images.
10. Q: Why was an unspecific benign impression noted compared to specific diagnosis?
    A: This was generally due to history provided and images being too poor get specific diagnosis. No alarm bells. Also recording changed during trial.
    Was this related to image and follow up default?

WB overall enjoyed and felt the patients who did follow up all seemed motivated and happy. WB believes ASICA is unique from the other app currently in development as it only does appointments rather than assessments. Dermatologists were aware of app but pretty hands off. Overall the videos on checking are very good and self-checking correctly can only be a good thing.

Ideas for improvement of app:
- Message function between clinician and patient
- App on own device or device more appropriately sized.
- Removal of the autozoom feature of the app pictures.
- Feature which could filter images which were not high enough quality and request better quality images

Table of clinical impression labelled benign: non-specific vs clinical disposal.

| Clinical Disposal | N (%) |
| --- | --- |
| Resolved with initial images | 20 (32.8) |
| Resolved after further Images | 9 (14.8) |
| Secondary care clinic | 3 (4.9) |
| GP referral or input | 6 (9.8) |
| Benign impression but patient non response | 14 (23.0) |
| Not resolved due to patient non response. | 9 (14.8) |
| Total | 61 (100) |

Table of clinical impression labelled benign: non-specific vs initial image quality.

| Initial quality of image | N (%) |
| --- | --- |
| Focused | 14 (23) |
| Blurred | 44 (72.1) |
| Not stated | 3 (4.9) |
| No image | 0 (0) |
| Total | 61 (100) |

Table of clinical impression labelled benign: non-specific vs further images requested.

| Further images requested | N (%) |
| --- | --- |
| No further images requested | 22 (36.1) |
| Further images requested and sent | 14 (23.0) |
| Further images requested and not sent | 20 (32.8) |
| Further images requested and declined | 2 (3.3) |
| Further images requested and not capable | 3 (4.9) |
| Total | 61 (100) |
